# Supplementary material
Source: PubMed Central journal article supplement (PMC2879288)

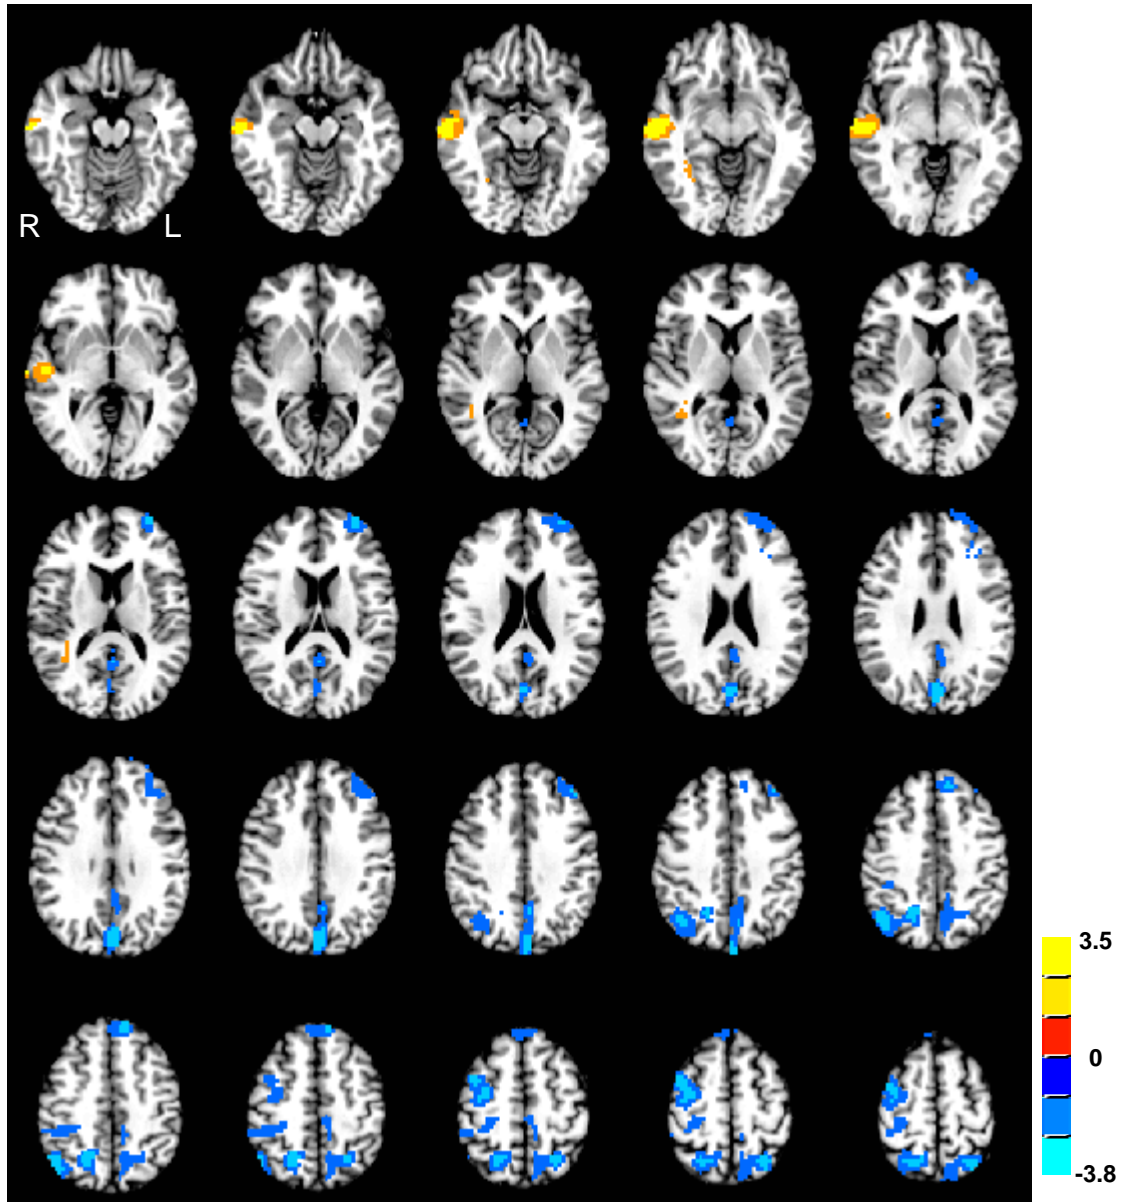

Supplementary figure 3

Supplement: NIHMS195761-supplement-01.pdf [file NIHMS195761-supplement-01.pdf]
